# Supplementary material for: Compact vs. Linear: Effects of Forest Structure, Patch Shape and Landscape Configuration on Black Alder Macromoth Communities
Source: Preprints.org preprint supplement (doi:10.20944/preprints202308.0254.v1), 2023-08-03
Supplement: Supplementary file 1 [file supplementary]

## Sheet: Table S1
Site code	Pin	On1	On2	On3	On4	On5	On6	On7	On8
Forest type	pine	alder	alder	alder	alder	alder	alder	alder	alder
Patch shape	N.A.	linear	compact	compact	linear	compact	linear	compact	linear
Latitude	39.276485°	39.392895°	39.390814°	39.335371°	39.344270°	39.315200°	39.317919°	39.320224°	39.323159°
Longitude	16.610338°	16.606906°	16.603829°	16.613818°	16.580303°	16.527341°	16.531533°	16.469319°	16.475090°
Orthosia (Orthosia) incerta (Hufnagel, 1766)	0	73	44	17	5	76	46	42	29
Eilema lurideola (Zincken, 1817)	41	1	122	144	7	6	3	23	2
Eilema complana (Linnaeus, 1758)	1	6	84	121	11	1	3	16	4
Hoplodrina cfr. octogenaria (Goeze, 1781)	38	4	13	12	6	74	43	37	39
Lycia hirtaria (Clerck, 1759)	0	3	58	68	4	31	6	19	4
Agrotis cinerea (Denis & Schiffermüller, 1775)	3	38	2	7	47	19	13	12	28
Luperina testacea (Denis & Schiffermüller, 1775)	4	2	2	7	49	6	10	5	38
Peribatodes rhomboidaria (Denis & Schiffermüller, 1775)	35	28	21	13	3	11	12	18	13
Lithosia quadra (Linnaeus, 1758)	0	0	21	48	4	0	0	27	1
Mythimna (Mythimna) impura (Hübner, 1808)	0	28	9	0	0	36	7	7	8
Xestia (Megasema) triangulum (Hufnagel, 1766)	14	0	21	14	0	4	5	46	5
Epirrhoe alternata (Müller, 1764)	0	21	18	3	2	20	15	2	7
Luperina dumerilii (Duponchel, 1826)	0	1	0	1	1	22	6	3	52
Pachetra sagittigera (Hufnagel, 1766)	6	10	8	7	27	4	9	10	11
Agrotis exclamationis (Linnaeus, 1758)	5	3	1	3	4	15	20	4	34
Diarsia mendica (Fabricius, 1775)	2	7	33	16	0	1	7	15	5
Pseudoterpna coronillaria (Hübner, 1817)	90	5	6	4	2	13	10	12	24
Cabera pusaria (Linnaeus, 1758)	0	17	23	7	1	15	3	8	0
Idaea deversaria (Herrich-Schäffer, 1847)	510	5	7	14	3	29	7	5	1
Oligia versicolor (Borkhausen, 1792)	0	29	14	4	1	5	1	9	8
Alcis repandata (Linnaeus, 1758)	143	7	44	10	1	0	1	6	1
Allophyes corsica (Spuler, 1905)	8	10	18	9	2	8	3	13	5
Gymnoscelis rufifasciata (Haworth, 1809)	40	22	15	22	0	1	1	5	1
Noctua fimbriata (Schreber, 1759)	5	1	11	36	1	4	1	12	1
Dysstroma truncata (Hufnagel, 1767)	3	0	38	25	0	2	0	1	0
Dendrolimus pini (Linnaeus, 1758)	12	3	19	37	3	0	1	1	0
Agrotis segetum (Denis & Schiffermüller, 1775)	4	0	2	13	9	10	4	9	16
Xanthorhoe montanata (Denis & Schiffermüller, 1775)	1	5	28	5	1	9	4	6	2
Tholera decimalis (Poda, 1761)	0	1	2	0	5	24	14	6	7
Hydriomena sanfilensis (Stauder, 1915)	0	15	25	9	4	1	1	3	1
Xestia (Xestia) stigmatica (Hübner, 1813)	2	10	3	0	1	15	20	0	9
Charanyca (Rusina) ferruginea (Esper, 1785)	3	7	13	9	0	2	7	14	3
Episema glaucina (Esper, 1789)	3	2	0	4	23	11	8	4	2
Eilema caniola (Hübner, 1808)	2	2	1	16	5	1	7	9	13
Scotopteryx chenopodiata (Linnaeus, 1758)	0	38	5	0	0	3	2	3	2
Colostygia pectinataria (Knoch, 1781)	5	8	22	5	0	9	3	2	3
Mythimna (Mythimna) conigera (Denis & Schiffermüller, 1775)	0	7	7	2	2	3	6	11	13
Solitanea mariae (Stauder, 1921)	0	6	14	2	2	6	4	13	4
Campaea margaritaria (Linnaeus, 1767)	3	2	15	15	0	5	7	7	0
Epirrita christyi (Allen, 1906)	16	4	20	0	2	4	2	8	7
Hoplodrina ambigua (Denis & Schiffermüller, 1775)	1	0	0	0	2	18	22	0	4
Agrochola (Leptologia) macilenta (Hübner, 1809)	5	0	0	1	0	11	9	4	21
Hoplodrina blanda (Denis & Schiffermüller, 1775)	0	1	0	0	0	0	22	8	14
Agrotis bigramma (Esper, 1790)	2	1	4	10	8	8	8	0	4
Idaea aversata (Linnaeus, 1758)	73	2	22	9	1	1	2	4	0
Hypena proboscidalis (Linnaeus, 1758)	9	5	23	10	0	1	0	2	0
Diacrisia sannio (Linnaeus, 1758)	0	18	1	0	1	8	8	0	4
Endromis versicolora (Linnaeus, 1758)	0	3	6	7	3	5	1	8	6
Conistra (Conistra) vaccinii (Linnaeus, 1761)	0	1	6	6	0	0	5	7	11
Apamea monoglypha (Hufnagel, 1766)	2	0	2	8	7	6	6	3	3
Orthosia (Semiophora) gothica (Linnaeus, 1758)	7	9	2	0	0	4	8	2	8
Mythimna (Hyphilare) albipuncta (Denis & Schiffermüller, 1775)	0	0	0	2	0	10	11	5	5
Polia nebulosa (Hufnagel, 1766)	9	7	5	11	0	4	3	3	0
Notodonta dromedarius (Linnaeus, 1758)	0	0	6	13	0	5	0	8	0
Noctua tirrenica Biebinger, Speidel & Hanigk, 1983	0	0	5	26	0	0	1	0	0
Cerastis rubricosa (Denis & Schiffermüller, 1775)	4	7	5	2	0	7	7	3	0
Apoda limacodes (Hufnagel, 1766)	0	0	18	9	0	0	0	4	0
Poecilocampa alpina (Frey & Wullschlegel, 1874)	0	4	5	7	0	1	3	1	7
Cosmorhoe ocellata (Linnaeus, 1758)	3	3	3	12	0	2	5	0	2
Agrotis clavis (Hufnagel, 1766)	2	4	1	0	10	3	2	0	6
Lomaspilis marginata (Linnaeus, 1758)	13	3	1	5	0	0	12	3	2
Athetis (Hydrillula) pallustris (Hübner, 1808)	0	18	0	0	0	0	7	0	0
Euxoa (Euxoa) tritici (Linnaeus, 1761)	0	0	1	1	0	6	10	6	1
Eupithecia vulgata (Haworth, 1809)	6	2	15	0	0	6	1	0	1
Xestia (Xestia) baja (Denis & Schiffermüller, 1775)	0	6	4	1	0	3	5	3	2
Mesapamea secalis (Linnaeus, 1758)	0	0	0	0	0	5	1	1	16
Oligia strigilis (Linnaeus, 1758)	2	4	4	0	0	4	1	6	4
Idaea trigeminata (Haworth, 1809)	13	0	0	21	1	1	0	0	0
Hoplodrina respersa (Denis & Schiffermüller, 1775)	0	0	0	0	0	22	0	0	0
Stilbia faillae Püngeler, 1918	2	2	5	4	1	3	4	1	2
Apamea syriaca (Osthelder, 1933)	0	2	3	7	0	4	3	2	1
Agrochola (Anchoscelis) litura (Linnaeus, 1758)	0	0	0	1	1	15	3	0	0
Orthosia (Monima) cerasi (Fabricius, 1775)	0	13	1	1	0	0	1	1	3
Eilema pygmaeola (Doubleday, 1847)	0	2	2	1	5	7	2	1	0
Colotois pennaria (Linnaeus, 1761)	4	1	5	1	1	4	0	7	1
Autographa pulchrina (Haworth, 1809)	0	1	3	3	0	0	1	11	1
Luperina rubella (Duponchel, 1835)	0	0	0	0	3	5	7	1	3
Idaea mutilata (Staudinger, 1876)	4	0	0	2	15	2	0	0	0
Dasypolia (Dasypolia) templi (Thunberg, 1792)	0	3	0	1	2	7	2	3	1
Noctua interposita (Hübner, 1790)	3	2	2	2	0	7	2	3	1
Scotopteryx luridata (Hufnagel, 1767)	183	2	1	5	0	1	4	4	2
Comibaena bajularia (Denis & Schiffermüller, 1775)	0	0	1	16	2	0	0	0	0
Xestia (Megasema) c-nigrum (Linnaeus, 1758)	0	0	1	2	1	5	5	1	3
Mythimna (Hyphilare) ferrago (Fabricius, 1787)	1	2	0	5	1	1	2	3	3
Eupithecia subfuscata (Haworth, 1809)	0	0	12	3	0	0	0	0	2
Pennithera firmata (Hübner, 1822)	32	0	9	7	0	0	0	0	1
Rhodostrophia vibicaria (Clerck, 1759)	13	0	1	1	7	4	2	0	1
Gandaritis pyraliata (Denis & Schiffermüller, 1775)	4	3	6	3	1	1	2	0	0
Hydriomena furcata (Thunberg, 1784)	0	1	4	5	0	1	4	0	0
Noctua pronuba Linnaeus, 1758	7	2	2	7	0	1	2	1	0
Opisthograptis luteolata (Linnaeus, 1758)	5	3	4	6	0	0	0	1	1
Siona lineata (Scopoli, 1763)	0	2	0	0	1	1	6	0	4
Ammoconia caecimacula (Denis & Schiffermüller, 1775)	0	0	0	0	0	7	7	0	0
Epirrhoe galiata (Denis & Schiffermüller, 1775)	9	2	1	3	1	0	2	1	4
Meganola strigula (Denis & Schiffermüller, 1775)	1	2	0	11	0	0	0	1	0
Lymantria monacha (Linnaeus, 1758)	0	0	6	4	0	0	0	4	0
Litoligia literosa (Haworth, 1809)	3	0	1	0	3	3	1	3	2
Charanyca (Rusina) apfelbecki (Rebel, 1901)	5	1	5	2	1	0	1	1	2
Selenia lunularia (Hübner, 1788)	15	0	4	2	0	0	0	5	2
Biston betularia (Linnaeus, 1758)	0	0	4	2	0	0	1	6	0
Scotopteryx angularia (de Villers, 1789)	5	0	7	6	0	0	0	0	0
Colocasia coryli (Linnaeus, 1758)	1	0	6	7	0	0	0	0	0
Idaea humiliata (Hufnagel, 1767)	0	2	1	0	1	0	1	0	7
Hyphoraia testudinaria (Fourcroy, 1785)	0	2	0	0	1	1	4	3	1
Cleoceris scoriacea (Esper, 1789)	0	0	0	4	0	5	0	2	1
Mesoligia furuncula (Denis & Schiffermüller, 1775)	1	2	0	0	0	6	0	0	3
Aporophyla (Phylapora) lueneburgensis (Freyer, 1848)	0	0	0	0	0	7	4	0	0
Perconia strigillaria (Hübner, 1787)	0	4	0	0	1	3	1	1	1
Agrochola (Leptologia) lota (Clerck, 1759)	0	0	0	0	0	6	3	1	1
Peridroma saucia (Hübner, 1808)	3	1	1	1	1	3	3	1	0
Erannis defoliaria (Clerck, 1759)	0	0	2	0	0	0	2	1	6
Polymixis (Polymixis) polymita (Linnaeus, 1761)	0	2	0	3	1	3	1	0	1
Crocallis elinguaria (Linnaeus, 1758)	1	2	3	0	0	0	2	1	3
Thaumetopoea pityocampa (Denis & Schiffermüller, 1775)	512	1	4	1	2	1	0	2	0
Larentia clavaria (Haworth, 1809)	0	1	4	0	0	2	1	3	0
Apamea crenata (Hufnagel, 1766)	0	0	1	5	0	1	0	4	0
Stauropus fagi (Linnaeus, 1758)	0	0	4	5	0	0	0	2	0
Mythimna (Hyphilare) l-album (Linnaeus, 1767)	3	1	1	1	0	1	3	0	3
Aplocera plagiata (Linnaeus, 1758)	8	1	0	2	0	1	2	2	2
Diloba caeruleocephala (Linnaeus, 1758)	5	3	2	0	1	1	0	3	0
Charanyca (Charanyca) trigrammica (Hufnagel, 1766)	0	0	3	2	0	2	3	0	0
Atypha pulmonaris (Esper, 1790)	3	0	0	5	0	0	1	3	1
Cyclophora (Codonia) linearia (Hübner, 1799)	10	0	5	1	0	0	0	4	0
Conisania (Luteohadena) luteago (Denis & Schiffermüller, 1775)	4	0	1	1	1	1	1	2	2
Eilema palliatella (Scopoli, 1763)	0	5	2	2	0	0	0	0	0
Acronicta (Viminia) rumicis (Linnaeus, 1758)	1	1	1	2	0	2	0	3	0
Lasiocampa (Pachygastria) trifolii (Denis & Schiffermüller, 1775)	0	3	0	0	0	2	0	0	3
Operophtera fagata (Scharfenberg, 1805)	0	1	0	0	1	0	1	1	4
Dichagyris (Dichagyris) nigrescens (Höfner, 1888)	0	0	0	0	2	3	1	1	1
Thalpophila matura (Hufnagel, 1766)	0	1	0	0	0	1	3	1	2
Conistra (Peperina) torrida (Lederer, 1857)	0	1	0	1	2	1	2	1	0
Idaea fuscovenosa (Goeze, 1781)	20	0	0	5	1	0	0	0	2
Diachrysia chrysitis (Linnaeus, 1758)	0	1	3	1	0	0	0	1	2
Tiliacea aurago (Denis & Schiffermüller, 1775)	2	0	4	1	0	1	1	1	0
Drymonia querna (Denis & Schiffermüller, 1775)	0	0	0	8	0	0	0	0	0
Thalera fimbrialis (Scopoli, 1763)	0	0	0	0	0	2	5	0	0
Hadena (Hadena) filograna (Esper, 1788)	1	0	0	0	0	3	2	1	1
Rhodostrophia calabra (Petagna, 1786)	0	0	1	0	3	2	1	0	0
Thetidia (Antonechloris) smaragdaria (Fabricius, 1787)	3	0	0	0	0	0	2	2	3
Chersotis rectangula (Denis & Schiffermüller, 1775)	0	2	2	0	1	1	0	0	1
Lacanobia (Diataraxia) oleracea (Linnaeus, 1758)	0	0	2	1	0	1	1	1	1
Pheosia tremula (Clerck, 1759)	2	1	0	0	0	0	0	5	1
Aplocera praeformata (Hübner, 1826)	1	1	2	0	0	0	1	3	0
Tephronia sepiaria (Hufnagel, 1767)	4	0	0	5	0	1	0	1	0
Ennomos quercinaria (Hufnagel, 1767)	0	0	7	0	0	0	0	0	0
Pterostoma palpina (Clerck, 1759)	1	0	0	0	0	2	4	0	0
Dichagyris (Dichagyris) signifera (Denis & Schiffermüller, 1775)	3	1	1	0	3	1	0	0	0
Eupithecia venosata (Fabricius, 1787)	0	0	0	1	0	5	0	0	0
Hadena (Hadena) magnolii (Boisduval, 1829)	3	0	1	0	2	1	1	1	0
Scopula (Calothysanis) marginepunctata (Goeze, 1781)	2	1	2	1	1	1	0	0	0
Trichiura (Trichiura) crataegi (Linnaeus, 1758)	0	1	0	2	0	0	2	1	0
Laothoe populi (Linnaeus, 1758)	0	0	1	0	1	1	1	2	0
Itame messapiaria Sohn-Rethel, 1929	18	2	4	0	0	0	0	0	0
Cleorodes lichenaria (Hufnagel, 1767)	0	0	2	1	0	2	0	1	0
Gnophos (Gnophos) furvata (Denis & Schiffermüller, 1775)	0	0	1	1	1	0	0	3	0
Eugnorisma (Metagnorisma) depuncta (Linnaeus, 1761)	1	0	1	3	0	0	0	2	0
Xestia (Xestia) xanthographa (Denis & Schiffermüller, 1775)	0	0	0	0	0	0	5	0	0
Catarhoe cuculata (Hufnagel, 1767)	2	0	0	1	0	0	0	0	4
Conistra (Dasycampa) rubiginea (Denis & Schiffermüller, 1775)	1	0	0	0	0	0	0	1	4
Eupithecia semigraphata Bruand, 1850	0	2	1	0	0	0	0	0	2
Antitype chi (Linnaeus, 1758)	0	0	0	1	0	2	0	1	1
Hylaea mediterranea Sihvonen, Skou, Flamigni, Fiumi & Hausmann, 2014	5	0	2	0	2	0	0	1	0
Geometra papilionaria (Linnaeus, 1758)	0	0	3	0	0	1	0	0	1
Ochropleura leucogaster (Freyer, 1831)	0	1	2	1	0	1	0	0	0
Arctia caja (Linnaeus, 1758)	0	2	1	0	0	0	0	2	0
Euplexia lucipara (Linnaeus, 1758)	0	0	4	0	0	1	0	0	0
Noctua janthina (Denis & Schiffermüller, 1775)	0	0	0	4	0	0	1	0	0
Orthosia (Monima) populeti (Fabricius, 1775)	0	0	1	0	0	0	1	3	0
Mesotype parallelolineata (Retzius, 1783)	0	0	0	5	0	0	0	0	0
Apamea epomidion (Haworth, 1809)	0	0	3	1	0	0	0	1	0
Hadena (Hadena) confusa (Hufnagel, 1766)	1	2	0	0	1	1	0	0	0
Idaea ochrata (Scopoli, 1763)	0	0	0	0	0	0	1	0	3
Idaea straminata (Borkhausen, 1794)	0	0	0	0	2	2	0	0	0
Agrotis catalaunensis (Millière, 1873)	0	0	0	0	0	4	0	0	0
Oligia latruncula (Denis & Schiffermüller, 1775)	0	0	0	0	0	0	1	0	3
Tethea or (Denis & Schiffermüller, 1775)	1	2	0	1	0	0	0	0	1
Xanthia (Xanthia) togata (Esper, 1788)	1	0	0	0	0	1	1	1	1
Charissa (Charissa) obscurata (Denis & Schiffermüller, 1775)	0	0	1	0	1	1	0	0	1
Earophila badiata (Denis & Schiffermüller, 1775)	0	0	0	0	0	2	0	1	1
Eupithecia icterata (de Villers, 1789)	0	0	0	1	0	1	0	0	2
Rhodometra sacraria (Linnaeus, 1767)	0	2	1	0	0	0	0	0	1
Agrotis ipsilon (Hufnagel, 1766)	0	0	0	0	0	1	1	1	1
Colostygia sericeata (Schwingenschuss, 1926)	15	0	0	2	2	0	0	0	0
Cyclophora (Cyclophora) puppillaria (Hübner, 1799)	9	1	0	2	0	0	1	0	0
Ptilophora variabilis Hartig, 1968	0	1	0	2	0	0	1	0	0
Arctia villica (Linnaeus, 1758)	8	0	2	1	0	1	0	0	0
Sphinx pinastri (Linnaeus, 1758)	2	0	0	3	1	0	0	0	0
Macrothylacia rubi (Linnaeus, 1758)	0	0	1	1	0	0	0	1	1
Helicoverpa armigera (Hübner, 1808)	0	0	0	0	0	0	0	4	0
Ocneria rubea (Denis & Schiffermüller, 1775)	0	0	0	3	0	0	0	1	0
Chiasmia clathrata (Linnaeus, 1758)	4	0	0	0	0	1	0	0	2
Cosmia (Calymnia) trapezina (Linnaeus, 1758)	1	1	0	0	0	0	0	0	2
Xanthia (Cirrhia) icteritia (Hufnagel, 1766)	1	0	0	0	0	2	1	0	0
Acossus terebra (Denis & Schiffermüller, 1775)	0	3	0	0	0	0	0	0	0
Eupithecia pyreneata Mabille, 1871	0	0	0	0	0	0	1	0	2
Apamea sordens (Hufnagel, 1766)	0	0	0	0	0	0	1	0	2
Euxoa (Euxoa) nigricans (Linnaeus, 1761)	0	0	0	0	0	0	0	0	3
Hoplodrina superstes (Ochsenheimer, 1816)	0	1	0	0	0	2	0	0	0
Lacanobia (Lacanobia) w-latinum (Hufnagel, 1766)	5	0	0	1	0	1	0	0	1
Spodoptera exigua (Hübner, 1808)	1	0	0	0	0	0	0	1	2
Triodia sylvina (Linnaeus, 1761)	0	2	0	0	0	0	0	1	0
Mesotype didymata (Linnaeus, 1758)	0	2	0	0	0	0	0	1	0
Lasionycta proxima (Hübner, 1809)	0	2	0	0	0	0	0	1	0
Plusidia cheiranthi (Tauscher, 1809)	0	0	1	0	0	1	1	0	0
Charissa (Kemtrognophos) onustaria (Herrich-Schäffer, 1852)	26	0	1	1	1	0	0	0	0
Xanthorhoe fluctuata (Linnaeus, 1758)	4	0	1	1	1	0	0	0	0
Chesias rufata (Fabricius, 1775)	2	0	1	1	1	0	0	0	0
Phalera bucephala (Linnaeus, 1758)	2	1	0	2	0	0	0	0	0
Agriopis aurantiaria (Hübner, 1799)	0	0	2	0	0	0	0	0	1
Macaria liturata (Clerck, 1759)	0	1	2	0	0	0	0	0	0
Ecliptopera silaceata (Denis & Schiffermüller, 1775)	0	1	2	0	0	0	0	0	0
Scopula (Calothysanis) imitaria (Hübner, 1799)	0	0	2	0	0	1	0	0	0
Chersotis margaritacea (Villers, 1789)	0	0	0	2	0	0	0	0	1
Camptogramma bilineata (Linnaeus, 1758)	4	0	3	0	0	0	0	0	0
Thera britannica (Turner, 1925)	4	0	2	0	0	0	0	1	0
Fagivorina arenaria (Hufnagel, 1767)	2	0	1	2	0	0	0	0	0
Adactylotis contaminaria (Hübner, 1813)	0	0	0	3	0	0	0	0	0
Peribatodes secundaria (Denis & Schiffermüller, 1775)	0	0	3	0	0	0	0	0	0
Epirrita dilutata (Denis & Schiffermüller, 1775)	0	0	0	3	0	0	0	0	0
Idaea dimidiata (Hufnagel, 1767)	0	0	2	0	0	0	0	1	0
Macdunnoughia confusa (Stephens, 1850)	0	0	0	0	0	0	0	3	0
Subaronicta megacephala (Denis & Schiffermüller, 1775)	1	2	0	0	0	0	0	0	0
Lygephila procax (Hübner, 1813)	1	1	0	0	0	0	0	0	1
Nychiodes (Nychiodes) ragusaria Millière, 1884	0	0	0	0	0	1	1	0	0
Eupithecia millefoliata Rössler, 1866	0	0	0	0	0	0	0	0	2
Eupithecia tenuiata (Hübner, 1813)	0	1	0	0	0	1	0	0	0
Scopula (Scopula) tessellaria (Boisduval, 1840)	0	0	0	0	0	0	2	0	0
Agrochola (Anchoscelis) pistacinoides (d'Aubuisson, 1867)	0	0	0	0	0	1	1	0	0
Aporophyla (Phylapora) nigra (Haworth, 1809)	0	0	0	0	0	2	0	0	0
Apterogenum ypsillon (Denis & Schiffermüller, 1775)	0	0	0	0	0	0	2	0	0
Chloroclysta siterata (Hufnagel, 1767)	3	0	1	0	0	0	0	0	1
Ochropleura plecta (Linnaeus, 1761)	1	1	1	0	0	0	0	0	0
Eublemma viridula (Guenée, 1841)	1	0	0	0	0	0	0	1	1
Saturnia (Eudia) pavoniella (Scopoli, 1763)	0	0	0	0	0	0	0	1	1
Eupithecia insigniata (Hübner, 1790)	0	0	1	0	1	0	0	0	0
Valeria oleagina (Denis & Schiffermüller, 1775)	0	0	0	0	0	1	0	1	0
Agrotis trux (Hübner, 1824)	0	0	0	1	1	0	0	0	0
Euxoa (Euxoa) obelisca (Denis & Schiffermüller, 1775)	0	0	1	0	0	1	0	0	0
Lacanobia (Dianobia) contigua (Denis & Schiffermüller, 1775)	0	1	1	0	0	0	0	0	0
Panolis flammea (Denis & Schiffermüller, 1775)	0	0	0	1	1	0	0	0	0
Hadena (Hadena) bicruris (Hufnagel, 1766)	1	0	1	0	0	0	0	1	0
Menophra abruptaria (Thunberg, 1792)	0	0	2	0	0	0	0	0	0
Pungeleria capreolaria (Denis & Schiffermüller, 1775)	0	0	2	0	0	0	0	0	0
Eupithecia trisignaria Herrich-Schäffer, 1848	0	0	0	2	0	0	0	0	0
Apamea ferrago (Eversmann, 1837)	0	0	2	0	0	0	0	0	0
Tiliacea sulphurago (Denis & Schiffermüller, 1775)	0	0	0	0	0	0	0	2	0
Dysauxes ancilla (Linnaeus, 1767)	0	0	0	2	0	0	0	0	0
Nola confusalis (Herrich-Schäffer, 1847)	0	0	1	1	0	0	0	0	0
Chloantha hyperici (Denis & Schiffermüller, 1775)	3	0	0	0	0	0	1	0	0
Lygephila craccae (Denis & Schiffermüller, 1775)	3	0	0	0	0	0	0	0	1
Catocala fraxini (Linnaeus, 1758)	2	1	0	0	0	0	0	0	0
Amphipyra (Amphipyra) pyramidea (Linnaeus, 1758)	1	1	0	0	0	0	0	0	0
Noctua comes Hübner, 1813	1	1	0	0	0	0	0	0	0
Drepana falcataria (Linnaeus, 1758)	0	0	0	0	0	1	0	0	0
Thyatira batis (Linnaeus, 1758)	0	1	0	0	0	0	0	0	0
Epione repandaria (Hufnagel, 1767)	0	0	0	0	0	0	1	0	0
Lycia florentina (Stefanelli, 1882)	0	0	0	0	0	1	0	0	0
Pachycnemia hippocastanaria (Hübner, 1799)	0	0	0	0	0	1	0	0	0
Nothocasis rosariae Scalercio, Infusino, Hausmann, 2016	0	0	0	0	0	0	0	0	1
Operophtera brumata (Linnaeus, 1758)	0	0	0	0	0	1	0	0	0
Scotopteryx bipunctaria (Denis & Schiffermüller, 1775)	0	0	0	0	0	1	0	0	0
Idaea rubraria (Staudinger, 1901)	0	0	0	0	0	1	0	0	0
Agrochola (Agrochola) lychnidis (Denis & Schiffermüller, 1775)	0	0	0	0	0	1	0	0	0
Agrochola (Anchoscelis) helvola (Linnaeus, 1758)	0	0	0	0	0	1	0	0	0
Agrochola (Sunira) circellaris (Hufnagel, 1766)	0	1	0	0	0	0	0	0	0
Agrotis puta (Hübner, 1803)	0	0	0	0	0	1	0	0	0
Conistra (Orrhodiella) ragusae (Failla-Tedaldi, 1890)	0	0	0	0	0	1	0	0	0
Hada plebeja (Linnaeus, 1761)	0	1	0	0	0	0	0	0	0
Hadena (Anepia) perplexa (Denis & Schiffermüller, 1775)	0	1	0	0	0	0	0	0	0
Hadena (Hadena) albimacula (Borkhausen, 1792)	0	0	0	0	0	0	1	0	0
Hadena (Hadena) compta (Denis & Schiffermüller, 1775)	0	0	0	0	0	1	0	0	0
Hecatera bicolorata (Hufnagel, 1766)	0	0	0	0	0	0	1	0	0
Mythimna (Mythimna) vitellina (Hübner, 1808)	0	0	0	0	0	0	0	0	1
Mythimna (Pseudaletia) unipuncta (Haworth, 1809)	0	0	0	0	0	1	0	0	0
Mythimna (Sablia) sicula (Treitschke, 1835)	0	0	0	0	0	0	1	0	0
Noctua interjecta Hübner, 1803	0	1	0	0	0	0	0	0	0
Teinoptera olivina (Herrich-Schäffer, 1852)	0	0	0	0	0	0	1	0	0
Autographa gamma (Linnaeus, 1758)	0	1	0	0	0	0	0	0	0
Phragmatobia fuliginosa (Linnaeus, 1758)	0	1	0	0	0	0	0	0	0
Hypena lividalis (Hübner, 1796)	0	1	0	0	0	0	0	0	0
Calliteara pudibunda (Linnaeus, 1758)	6	0	1	0	0	0	0	0	0
Heliothis peltigera (Denis & Schiffermüller, 1775)	3	0	0	0	0	0	0	1	0
Cybosia mesomella (Linnaeus, 1758)	3	0	0	0	0	0	0	1	0
Noctua janthe (Borkhausen, 1792)	2	0	0	1	0	0	0	0	0
Ptilodon capucina (Linnaeus, 1758)	1	0	1	0	0	0	0	0	0
Amphipyra (Amphipyra) tragopoginis (Clerck, 1759)	1	0	0	1	0	0	0	0	0
Lasiocampa (Lasiocampa) quercus (Linnaeus, 1758)	0	0	0	1	0	0	0	0	0
Eupithecia dodoneata Guenée, 1857	0	0	0	1	0	0	0	0	0
Eupithecia gemellata Herrich-Schäffer, 1861	0	0	0	1	0	0	0	0	0
Eupithecia innotata (Hufnagel, 1767)	0	0	1	0	0	0	0	0	0
Xanthorhoe vidanoi Parenzan & Hausmann, 1994	0	0	0	0	0	0	0	1	0
Idaea infirmaria (Rambur, 1833)	0	0	0	0	0	0	0	1	0
Idaea subsericeata (Haworth, 1809)	0	0	0	1	0	0	0	0	0
Scopula (Scopula) ornata (Scopoli, 1763)	0	0	0	1	0	0	0	0	0
Spatalia argentina (Denis & Schiffermüller, 1775)	0	0	0	1	0	0	0	0	0
Furcula furcula (Clerck, 1759)	0	0	1	0	0	0	0	0	0
Notodonta tritophus (Denis & Schiffermüller, 1775)	0	0	0	0	0	0	0	1	0
Ptilodon cucullina (Denis & Schiffermüller, 1775)	0	0	1	0	0	0	0	0	0
Clostera pigra (Hufnagel, 1766)	0	0	0	0	0	0	0	1	0
Apamea illyria Freyer, 1846	0	0	0	0	0	0	0	1	0
Epilecta linogrisea (Denis & Schiffermüller, 1775)	0	0	0	1	0	0	0	0	0
Mesapamea secalella Remm, 1983	0	0	1	0	0	0	0	0	0
Mniotype solieri (Boisduval, 1840)	0	0	0	1	0	0	0	0	0
Phlogophora meticulosa (Linnaeus, 1758)	0	0	1	0	0	0	0	0	0
Phragmatiphila parenzani Scalercio & Hausmann, 2022	0	0	1	0	0	0	0	0	0
Xylena (Xylena) exsoleta (Linnaeus, 1758)	0	0	0	0	0	0	0	1	0
Parascotia fuliginaria (Linnaeus, 1761)	0	0	0	1	0	0	0	0	0
Idia calvaria (Denis & Schiffermüller, 1775)	0	0	0	1	0	0	0	0	0
Nola cucullatella (Linnaeus, 1758)	0	0	0	0	0	0	0	1	0
Eupithecia indigata (Hübner, 1813)	13	0	0	0	0	0	0	0	0
Idaea degeneraria (Hübner, 1799)	5	0	0	0	0	0	0	0	0
Catocala nymphaea (Esper, 1787)	5	0	0	0	0	0	0	0	0
Watsonalla cultraria (Fabricius, 1775)	4	0	0	0	0	0	0	0	0
Lobophora halterata (Hufnagel, 1767)	4	0	0	0	0	0	0	0	0
Trigonophora (Trigonophora) flammea (Esper, 1785)	4	0	0	0	0	0	0	0	0
Catocala nymphagoga (Esper, 1787)	4	0	0	0	0	0	0	0	0
Drymonia velitaris (Hufnagel, 1766)	2	0	0	0	0	0	0	0	0
Callimorpha dominula (Linnaeus, 1758)	2	0	0	0	0	0	0	0	0
Diaphora mendica (Clerck, 1759)	2	0	0	0	0	0	0	0	0
Clytie syriaca (Bugnion, 1837)	2	0	0	0	0	0	0	0	0
Phragmataecia castaneae (Hübner, 1790)	1	0	0	0	0	0	0	0	0
Selidosema brunnearia (Villers, 1789)	1	0	0	0	0	0	0	0	0
Chloroclystis v-ata (Haworth, 1809)	1	0	0	0	0	0	0	0	0
Colostygia olivata (Denis & Schiffermüller, 1775)	1	0	0	0	0	0	0	0	0
Nycterosea obstipata (Fabricius, 1794)	1	0	0	0	0	0	0	0	0
Cyclophora (Codonia) suppunctaria (Zeller, 1847)	1	0	0	0	0	0	0	0	0
Idaea consanguinaria (Lederer, 1853)	1	0	0	0	0	0	0	0	0
Idaea filicata (Hübner, 1799)	1	0	0	0	0	0	0	0	0
Asteroscopus sphinx (Hufnagel, 1766)	1	0	0	0	0	0	0	0	0
Caradrina (Paradrina) clavipalpis Scopoli, 1763	1	0	0	0	0	0	0	0	0
Polyphaenis sericata (Esper, 1787)	1	0	0	0	0	0	0	0	0
Leucoma salicis (Linnaeus, 1758)	1	0	0	0	0	0	0	0	0
